# Supplementary material for: Local concentration controls the hydrate phase of calcium oxalate
Source: Royal Society of Chemistry journal article supplement (doi:10.1039/d3ce01286g), 2024-01-01
Supplement: d3ce01286g1.pdf [file d3ce01286g1.pdf]

## Supplementary information

### Local concentration controls the hydrate phase of calcium oxalate

Zhaodong Wang, Lala Du, Qihang Wang, Jingjing Xie, Zhengyi Fu, and Zhaoyong Zou\*

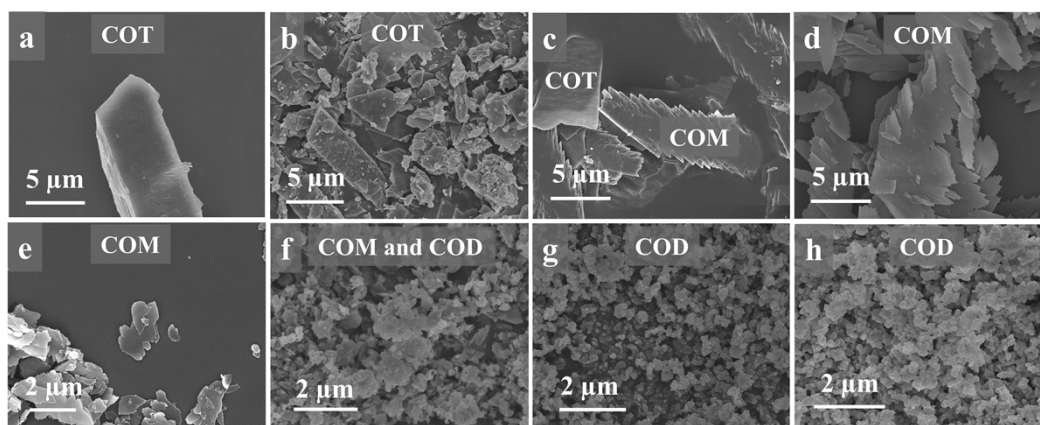

**Figure S1.** SEM images of samples collected after obtained after 10 min reaction for “calcium to oxalate” reaction at various concentrations: (a) 0.625mM, (b) 1.25mM-C1, (c) 1.25mM-C2, (d) 2.5mM, (e) 5 mM, (f) 10 mM, (g) 20 mM, (h) 40 mM.

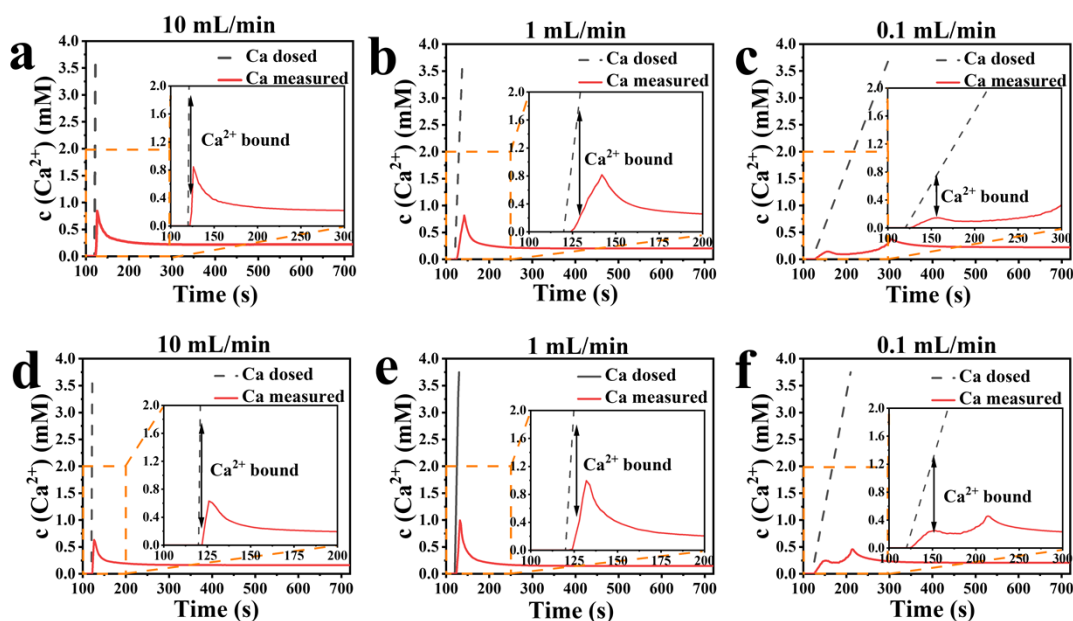

**Figure S2.** Curves of Ca<sup>2+</sup> concentration for reaction with (a-c) 1 M and (d-f) 0.5 M CaCl<sub>2</sub> solution in titration equipment. (a, d) the titration rate is 10 mL/min, (b, e) the titration rate is 1 mL/min, and (c, f) the titration rate is 0.1 mL/min.

---

## Calculations of the supersaturation

The ionic strength and supersaturation were calculated according to the literature<sup>1</sup>.

Briefly, the ionic strength (I) is calculated according to formula S1. The activity coefficient ( $\gamma$ ) is calculated according to formula S2. The activity is calculated according to formula S3. The supersaturations with respect to various phases are then calculated according to formula S4.

$$I = \frac{1}{2} \sum_{i=1}^n c_i Z_i^2 \quad \text{Formula S1}$$

$$\text{Log}(\gamma_i) = 0.5 \cdot Z_i^2 \left( \frac{\sqrt{I}}{1 + Ba\sqrt{I}} - 0.2 \cdot cI \right) \quad \text{Formula S2}$$

$$a_i = \frac{c_i}{\gamma_i} \quad \text{Formula S3}$$

$$S = \ln \frac{a_{Ca^{2+}} \cdot a_{Ox^{2-}}}{K_{sp}} \quad \text{Formula S4}$$

## Reference

1. H. Werner, S. Bapat, M. Schobesberger, D. Segets and S. P. Schwaminger, *ACS Omega*, 2021, **6**, 26566-26574.
